# Supplementary material for: Refractive indices for molecular crystals from the response of X-ray constrained Hartree–Fock wavefunctions
Source: Royal Society of Chemistry journal article supplement (doi:10.1039/b906072c), 2009-01-01
Supplement: b906072c.pdf [file b906072c.pdf]

## Supplementary Information

### Abbreviations:

|            |                                             |
|------------|---------------------------------------------|
| <b>MNA</b> | 2-methyl-4-nitroaniline                     |
| <b>POM</b> | 3-methyl-4-nitropyridine <i>N</i> -oxide    |
| <b>NPP</b> | <i>N</i> -4-nitrophenyl-L-prolinol          |
| <b>PNP</b> | 2-( <i>N</i> -(L)-prolinol)-5-nitropyridine |
| <b>pNA</b> | <i>p</i> -nitroaniline                      |

**Table S1** Details of X-ray diffraction data and multipole refinements.<sup>a</sup>

|                                                 | benzene <sup>b</sup> | urea <sup>c</sup>                                 | MNA <sup>d</sup> | POM                                                                | NPP                    | PNP                    | pNA                               |
|-------------------------------------------------|----------------------|---------------------------------------------------|------------------|--------------------------------------------------------------------|------------------------|------------------------|-----------------------------------|
| space group                                     | <i>Pbca</i>          | <i>P</i> $\bar{4}$ <i>2</i> <sub>1</sub> <i>m</i> | <i>Ia</i>        | <i>P2</i> <sub>1</sub> <i>2</i> <sub>1</sub> <i>2</i> <sub>1</sub> | <i>P2</i> <sub>1</sub> | <i>P2</i> <sub>1</sub> | <i>P2</i> <sub>1</sub> / <i>c</i> |
| <i>a</i> / Å                                    | 7.409                | 5.578                                             | 8.167            | 5.123                                                              | 5.172                  | 5.095                  | 8.471                             |
| <i>b</i> / Å                                    | 9.454                | 5.578                                             | 11.564           | 6.100                                                              | 14.845                 | 14.879                 | 6.020                             |
| <i>c</i> / Å                                    | 6.781                | 4.686                                             | 7.413            | 20.876                                                             | 7.150                  | 6.998                  | 12.087                            |
| $\alpha$ / °                                    | 90                   | 90                                                | 90               | 90                                                                 | 90                     | 90                     | 90                                |
| $\beta$ / °                                     | 90                   | 90                                                | 93.31            | 90                                                                 | 106.06                 | 107.75                 | 92.89                             |
| $\gamma$ / °                                    | 90                   | 90                                                | 90               | 90                                                                 | 90                     | 90                     | 90                                |
| <i>T</i> / K                                    | 110                  | 123                                               | 100              | 100                                                                | 100                    | 100                    | 100                               |
| $\sin(\theta/\lambda)_{\max}$ / Å <sup>-1</sup> | 1.11                 | 1.44                                              | 1.27             | 1.12                                                               | 1.11                   | 1.08                   | 1.14                              |
| <i>N</i> <sub>obs</sub>                         | 1766                 | 817                                               | 5055             | 4007                                                               | 5769                   | 5214                   | 5344                              |
| % <i>R</i> ( <i>F</i> )                         | 1.89                 | 1.17                                              | 1.74             | 2.22                                                               | 1.62                   | 1.22                   | 2.47                              |
| % <i>R</i> <sub>w</sub> ( <i>F</i> )            | 1.69                 | 0.64                                              | 1.59             | 1.83                                                               | 1.23                   | 1.11                   | 2.04                              |
| gof                                             | 1.04                 | 1.57                                              | 1.47             | 1.97                                                               | 1.35                   | 1.47                   | 1.87                              |
|                                                 | 4σ                   | 4σ                                                | 4σ               | 6σ                                                                 | 6σ                     | 6σ                     | 6σ                                |

<sup>a</sup> For computation of crystal refractive indices the following room temperature unit cell dimensions were used: benzene (−3°C): E. G. Cox, D. W. J. Cruickshank and J. A. S. Smith, *Proc. R. Soc. Lond. A*, 1958, **247**, 1-21; urea: N. Sklar, M. A. Senko and B. Post, *Acta Crystallogr.*, 1961, **14**, 716; POM: M. Shiro, M. Yamakawa and T. Kubota, *Acta Crystallogr., Sect. B*, 1977, **33**, 1549-1556; NPP: J. Zyss, J. F. Nicoud and M. Coquillay, *J. Chem. Phys.*, 1984, **81**, 4160-4167; PNP: R. J. Twieg and C. W. Dirk, *J. Chem. Phys.*, 1986, **85**, 3537-3543; pNA: H. Y. Qian, Z. G. Yin, J. Jia, N. Zhou and L. Q. Feng, *Acta Crystallogr., Sect. E: Struct. Rep. Online*, 2006, **62**, o5048-o5049; MNA: H. Graafsma, A. Paturle, L. Wu, H. S. Sheu, J. Majewski, G. Poorthuis and P. Coppens, *Acta Crystallogr., Sect. A*, 1992, **48**, 113-120.

<sup>b</sup> X-ray data from H. B. Bürgi, S. C. Capelli, A. E. Goeta, J. A. K. Howard, M. A. Spackman and D. S. Yufit, *Chem.-Eur. J.*, 2002, **8**, 3512-3521.

<sup>c</sup> X-ray data from H. Birkedal, D. Madsen, R. H. Mathiesen, K. Knudsen, H. P. Weber, P. Pattison and D. Schwarzenbach, *Acta Crystallogr., Sect. A*, 2004, **60**, 371-381.

<sup>d</sup> X-ray data from A. E. Whitten, P. Turner, W. T. Klooster, R. O. Piltz and M. A. Spackman, *J. Phys. Chem. A*, 2006, **110**, 8763-8776.

**Table S2** Molecular polarizability tensors (au).  $\bar{\alpha} = \frac{1}{3} \text{tr}(\boldsymbol{\alpha}) = \frac{1}{3}(\alpha_1 + \alpha_2 + \alpha_3)$  is the mean polarizability, where  $\alpha_1$ ,  $\alpha_2$  and  $\alpha_3$  are principal components of the tensor, and  $\kappa$  is the polarizability anisotropy, defined by  $\kappa = \frac{1}{\sqrt{2}} [(\alpha_1 - \alpha_2)^2 + (\alpha_1 - \alpha_3)^2 + (\alpha_2 - \alpha_3)^2]^{1/2}$ .

| molecule |                | Hartree-Fock | MP2    | MP2 + field | XCHF   |
|----------|----------------|--------------|--------|-------------|--------|
| benzene  | $\alpha_{xx}$  | 61.47        | 62.14  |             | 63.68  |
|          | $\alpha_{yy}$  | 76.32        | 77.81  |             | 78.16  |
|          | $\alpha_{zz}$  | 61.15        | 61.82  |             | 63.35  |
|          | $\alpha_{xy}$  | -6.41        | -6.75  |             | -6.90  |
|          | $\alpha_{xz}$  | -17.54       | -18.46 |             | -18.01 |
|          | $\alpha_{yz}$  | -6.39        | -6.74  |             | -6.53  |
|          | $\bar{\alpha}$ | 66.31        | 67.25  |             | 68.40  |
|          | $\kappa$       | 0.188        | 0.195  |             | 0.186  |
| urea     | $\alpha_{xx}$  | 29.03        | 32.85  | 33.17       | 33.45  |
|          | $\alpha_{yy}$  | 29.03        | 32.85  | 33.17       | 33.45  |
|          | $\alpha_{zz}$  | 36.08        | 41.15  | 39.98       | 40.10  |
|          | $\alpha_{xy}$  | 5.80         | 7.11   | 7.75        | 7.38   |
|          | $\alpha_{xz}$  | 0.000        | 0.000  | 0.000       | 0.000  |
|          | $\alpha_{yz}$  | 0.000        | 0.000  | 0.000       | 0.000  |
|          | $\bar{\alpha}$ | 31.38        | 35.61  | 35.44       | 35.67  |
|          | $\kappa$       | 0.130        | 0.139  | 0.142       | 0.135  |
| POM      | $\alpha_{xx}$  | 89.31        | 92.54  | 92.43       | 89.21  |
|          | $\alpha_{yy}$  | 119.32       | 136.85 | 135.09      | 127.51 |
|          | $\alpha_{zz}$  | 93.31        | 99.14  | 98.73       | 95.92  |
|          | $\alpha_{xy}$  | 24.93        | 29.51  | 29.06       | 27.24  |
|          | $\alpha_{xz}$  | -17.76       | -15.82 | -16.12      | -17.00 |
|          | $\alpha_{yz}$  | 24.59        | 31.95  | 31.03       | 29.20  |
|          | $\bar{\alpha}$ | 100.65       | 109.51 | 108.75      | 104.21 |
|          | $\kappa$       | 0.244        | 0.275  | 0.271       | 0.266  |
| NPP      | $\alpha_{xx}$  | 150.18       | 164.64 | 167.84      | 165.18 |
|          | $\alpha_{yy}$  | 174.68       | 190.81 | 192.95      | 187.84 |
|          | $\alpha_{zz}$  | 148.74       | 162.23 | 164.70      | 162.30 |
|          | $\alpha_{xy}$  | 29.49        | 36.94  | 39.79       | 39.14  |
|          | $\alpha_{xz}$  | -51.94       | -61.61 | -64.54      | -60.80 |
|          | $\alpha_{yz}$  | -19.05       | -24.89 | -27.39      | -27.00 |
|          | $\bar{\alpha}$ | 157.87       | 172.56 | 175.16      | 171.77 |
|          | $\kappa$       | 0.235        | 0.260  | 0.271       | 0.264  |
| PNP      | $\alpha_{xx}$  | 145.27       | 161.30 | 163.19      | 151.95 |
|          | $\alpha_{yy}$  | 166.38       | 183.18 | 184.79      | 166.95 |
|          | $\alpha_{zz}$  | 140.92       | 155.23 | 156.55      | 144.51 |
|          | $\alpha_{xy}$  | -27.08       | -34.85 | -36.90      | -31.58 |
|          | $\alpha_{xz}$  | -48.75       | -59.34 | -61.06      | -52.59 |
|          | $\alpha_{yz}$  | 18.50        | 24.50  | 26.31       | 22.37  |
|          | $\bar{\alpha}$ | 150.86       | 166.57 | 168.18      | 154.47 |
|          | $\kappa$       | 0.231        | 0.258  | 0.266       | 0.248  |
| pNA      | $\alpha_{xx}$  | 89.81        | 96.27  | 101.00      | 100.17 |
|          | $\alpha_{yy}$  | 97.83        | 104.71 | 108.24      | 102.31 |
|          | $\alpha_{zz}$  | 98.09        | 107.11 | 117.74      | 123.38 |
|          | $\alpha_{xy}$  | 2.20         | 0.92   | -3.95       | -7.88  |
|          | $\alpha_{xz}$  | -34.57       | -39.85 | -47.37      | -51.19 |

|            |                |        |        |        |        |
|------------|----------------|--------|--------|--------|--------|
|            | $\alpha_{yz}$  | 25.10  | 29.41  | 36.16  | 38.19  |
|            | $\bar{\alpha}$ | 95.25  | 102.70 | 108.99 | 108.62 |
|            | $\kappa$       | 0.261  | 0.280  | 0.319  | 0.349  |
| <b>MNA</b> | $\alpha_{xx}$  | 134.98 | 148.40 | 165.63 | 143.93 |
|            | $\alpha_{yy}$  | 115.71 | 123.39 | 125.00 | 119.19 |
|            | $\alpha_{zz}$  | 76.57  | 81.18  | 84.69  | 84.80  |
|            | $\alpha_{xy}$  | -6.18  | -8.08  | -14.97 | -8.54  |
|            | $\alpha_{xz}$  | 34.82  | 40.09  | 48.48  | 37.04  |
|            | $\alpha_{yz}$  | -5.49  | -6.61  | -9.85  | -6.90  |
|            | $\bar{\alpha}$ | 109.09 | 117.66 | 125.11 | 115.98 |
|            | $\kappa$       | 0.246  | 0.263  | 0.303  | 0.243  |
